# Supplementary material for: QTL Analysis of High Thermotolerance with Superior and Downgraded Parental Yeast Strains Reveals New Minor QTLs and Converges on Novel Causative Alleles Involved in RNA Processing
Source: PubMed Central journal article supplement (PMC3744412; doi:10.1371/journal.pgen.1003693), 2013-08-15

**Figure S1**

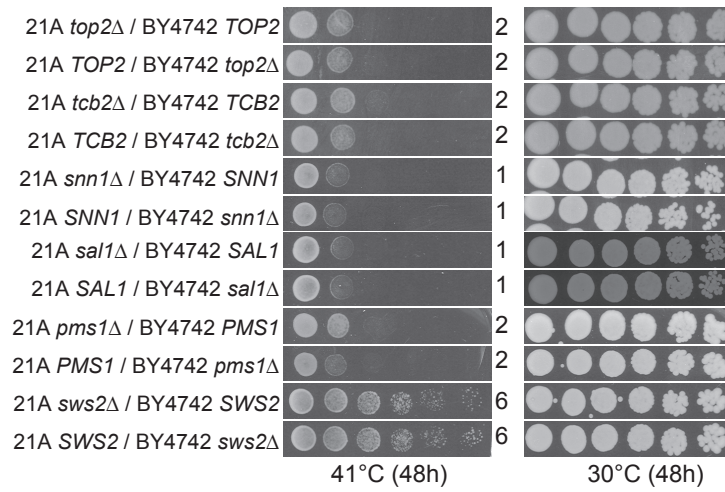

Supplement: pgen.1003693.s001.pdf [file pgen.1003693.s001.pdf]
