# Supplementary material for: QTL Analysis of High Thermotolerance with Superior and Downgraded Parental Yeast Strains Reveals New Minor QTLs and Converges on Novel Causative Alleles Involved in RNA Processing
Source: PubMed Central journal article supplement (PMC3744412; doi:10.1371/journal.pgen.1003693), 2013-08-15
Supplement: pgen.1003693.s002.pdf [file pgen.1003693.s002.pdf]

**Figure S2**
